# Supplementary material for: Constructing hybrid porous polymers from cubic octavinylsilsequioxane and planar halogenated benzene
Source: Royal Society of Chemistry journal article supplement (doi:10.1039/c3py01688a), 2014-01-01
Supplement: c3py01688a1.pdf [file c3py01688a1.pdf]

## Constructing Hybrid Porous Polymers from Cubic Octavinylsilsequioxane and Planar Halogenated Benzene

Dengxu Wang<sup>a,b</sup>, Wenyan Yang<sup>b</sup>, Shengyu Feng<sup>\*a,b</sup> and Hongzhi Liu<sup>\*b</sup>

<sup>a</sup> National Engineering Research Center for Colloidal Materials, <sup>b</sup> Key Laboratory of Special Functional Aggregated Material, Ministry of Education, School of Chemistry and Chemical Engineering, Jinan 250100, P. R. China

\*Corresponding Authors. Tel: +86 531 88364866. Fax: +86 531 88564464. E-mail:

fsy@sdu.edu.cn; liuhongzhi@sdu.edu.cn.

### Table of contents:

**Fig. S1.** Energy dispersive X-ray spectra of HPP-1 to HPP-3

**Fig. S2.** BET plots of HPP-1a (top,  $r = 0.999951$ ,  $C = 249.68$ ), HPP-1b (middle,  $r = 0.999977$ ,  $C = 118.96$ ) and HPP-1c (bottom,  $r = 0.999947$ ,  $C = 215.32$ )

**Fig. S3.** BET plots of HPP-2a (top,  $r = 0.999963$ ,  $C = 166.52$ ), HPP-2b (middle,  $r = 0.999925$ ,  $C = 338.44$ ) and HPP-2c (bottom,  $r = 0.999927$ ,  $C = 357.36$ )

**Fig. S4.** BET plots of HPP-3 ( $r = 0.999939$ ,  $C = 132.11$ )

**Fig. S5.** TGA curves of OVS and HPP-1~HPP-3 under  $N_2$  at  $10\text{ }^\circ\text{C min}^{-1}$

**Fig. S6.** The XRD pattern of HPP-1 to HPP-3

**Fig. S7.** FE-SEM images of a) HPP-1b, b) HPP-1c, c) HPP-2a, d) HPP-2b, e) HPP-2c and f) HPP-3

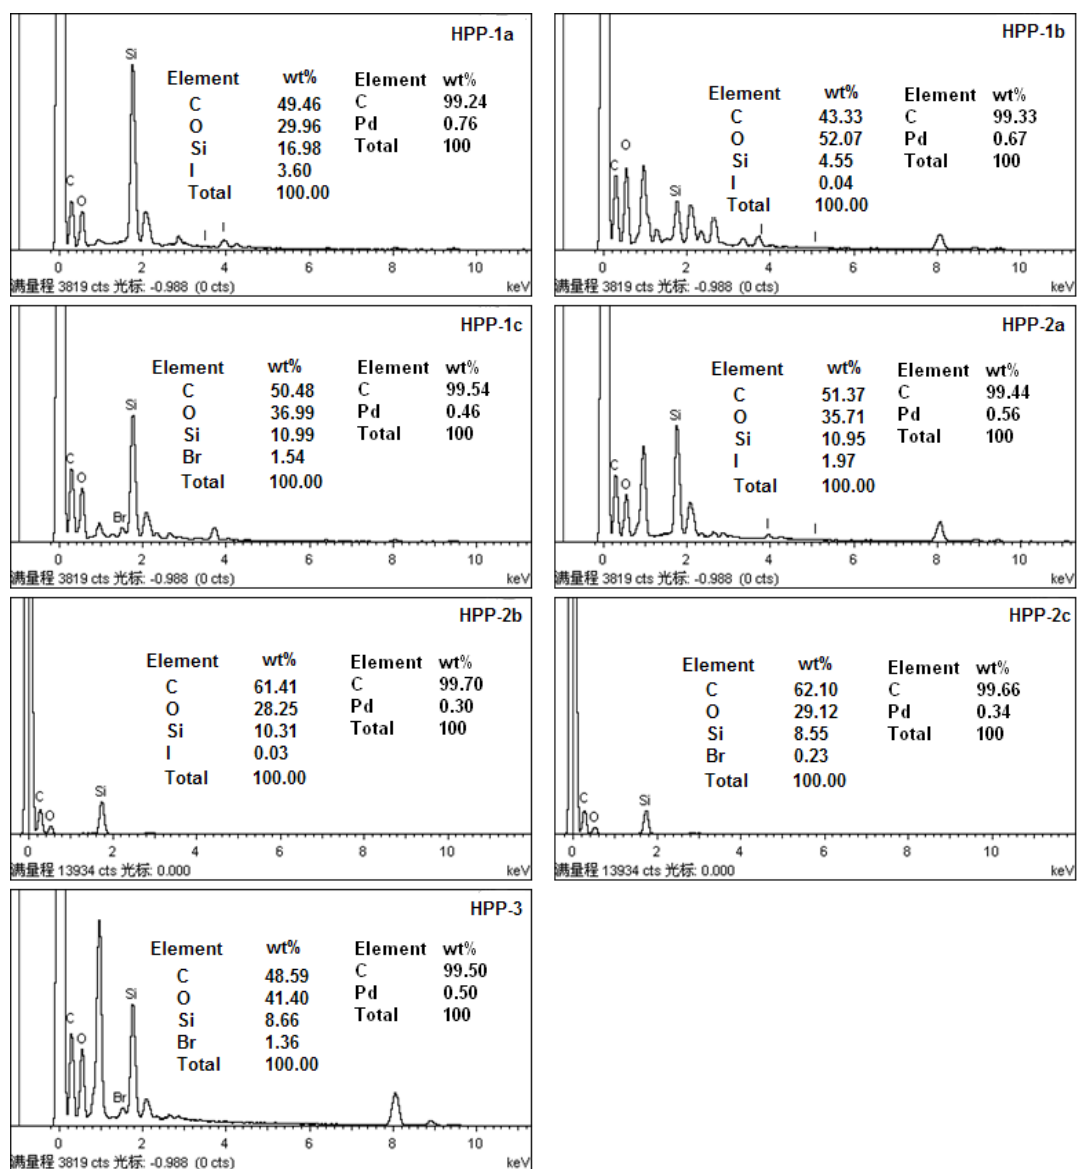

**Fig. S1.** Energy dispersive spectroscopy of HPP-1 to HPP-3

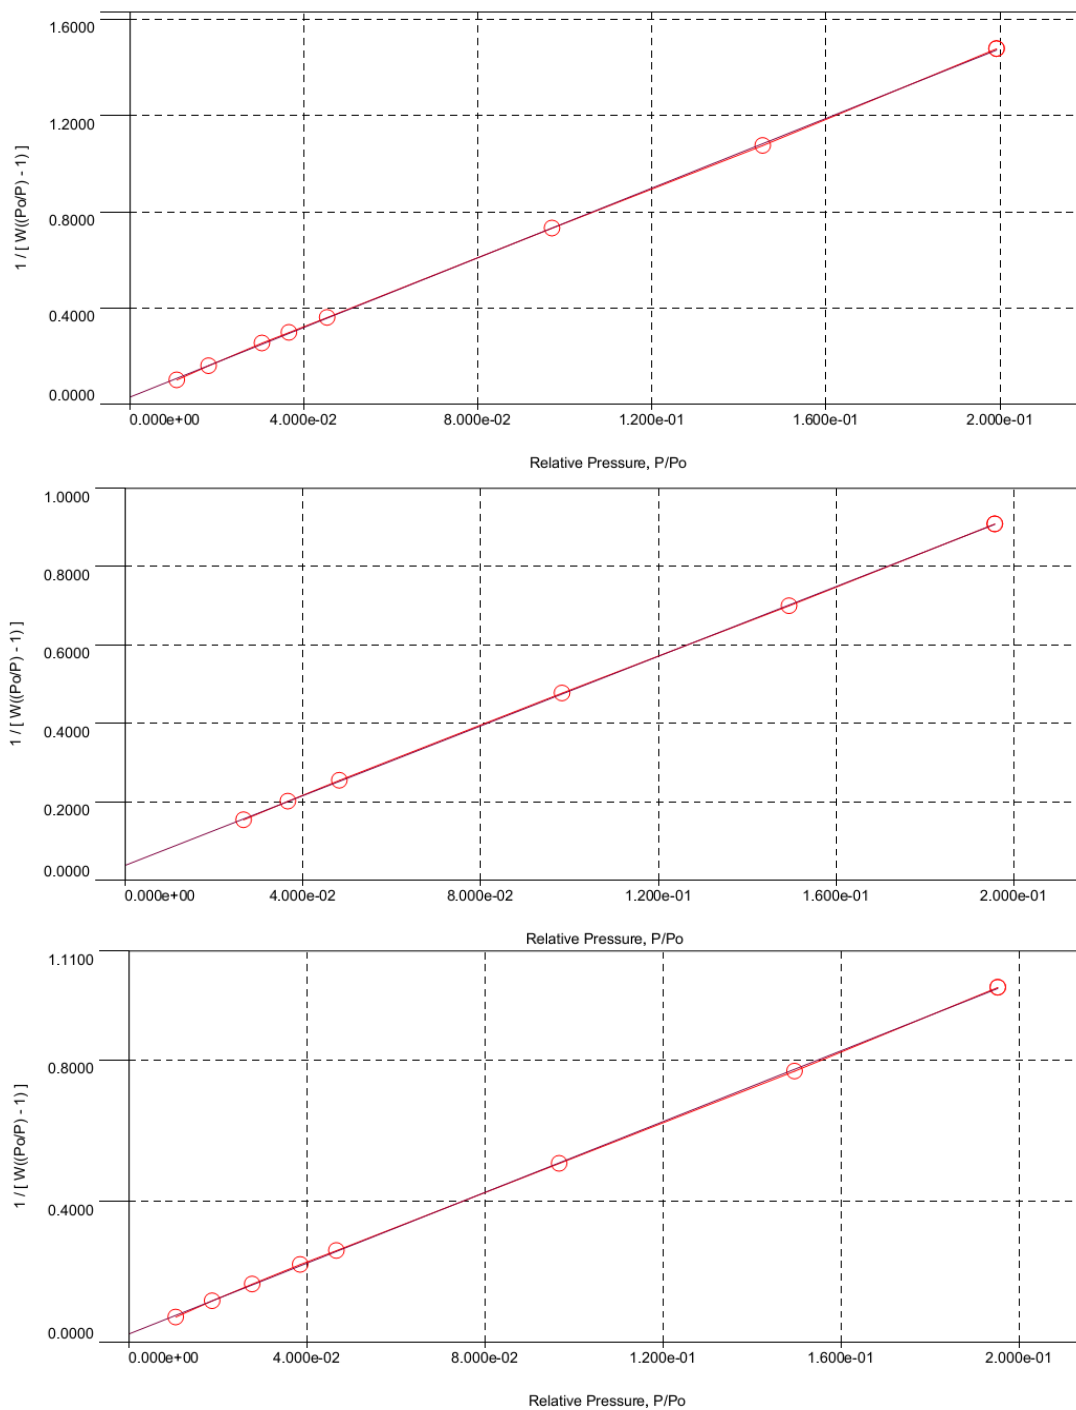

**Fig. S2.** BET plots of HPP-1a (top,  $r = 0.999951$ ,  $C = 249.68$ ), HPP-1b (middle,  $r = 0.999977$ ,  $C = 118.96$ ), HPP-1c (bottom,  $r = 0.999947$ ,  $C = 215.32$ )

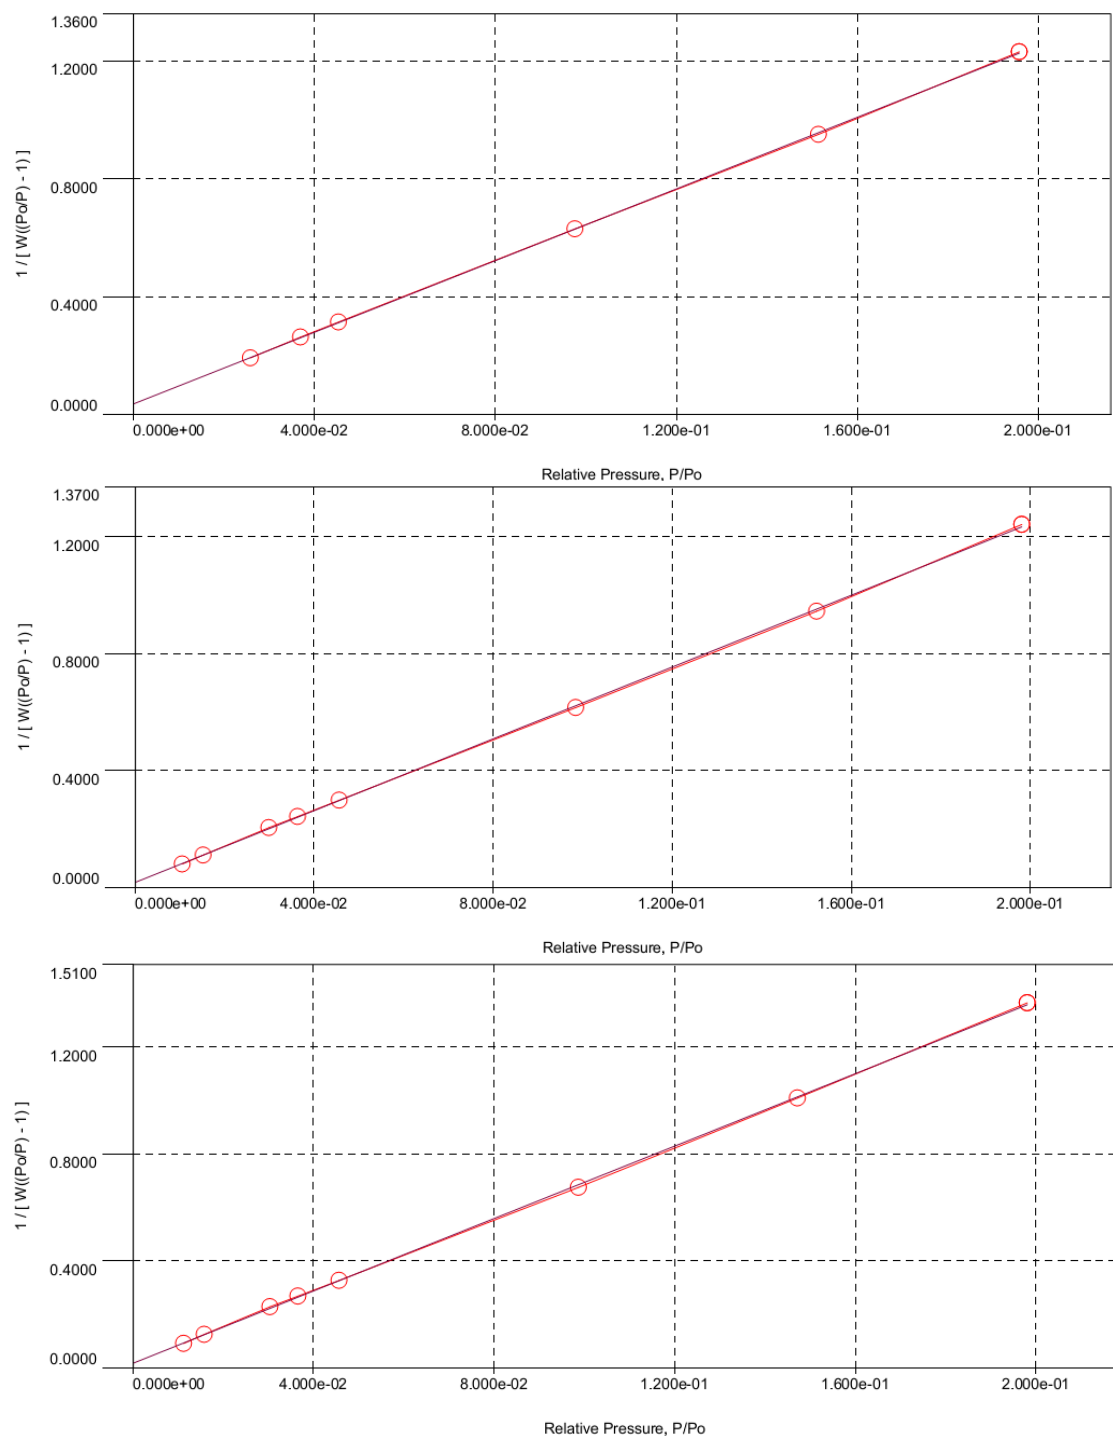

**Fig. S3.** BET plots of HPP-2a (top,  $r = 0.999963$ ,  $C = 166.52$ ), HPP-2b (middle,  $r = 0.999925$ ,  $C = 338.44$ ), HPP-2c (bottom,  $r = 0.999927$ ,  $C = 357.36$ ).

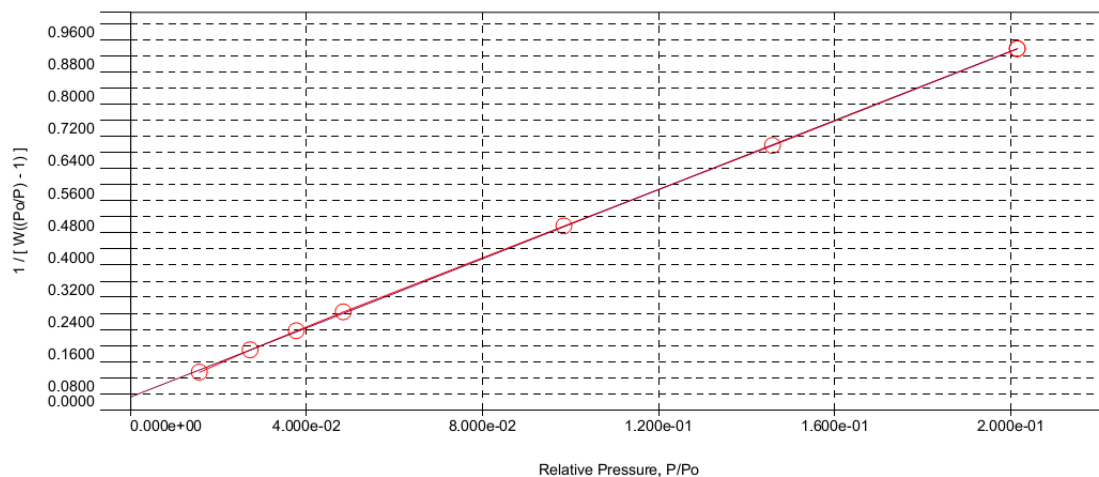

**Fig. S4.** BET plot of HPP-3 ( $r = 0.999939$ ,  $C = 132.11$ )

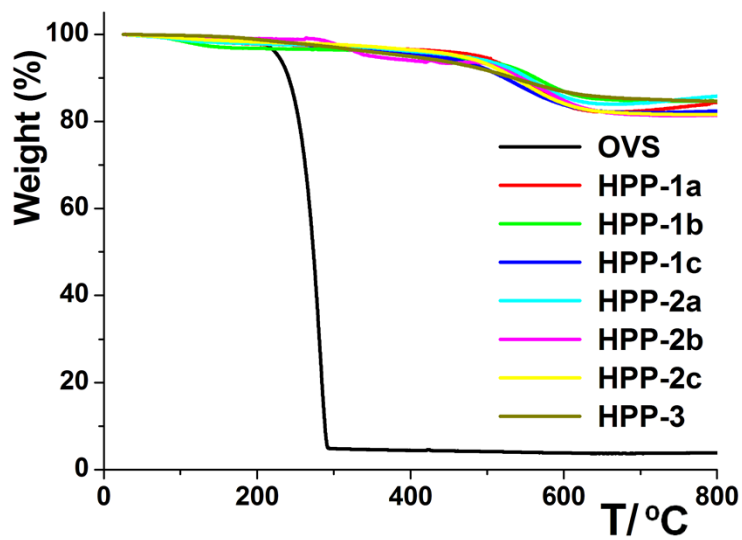

**Fig. S5.** TGA curves of OVS and HPP-1~HPP-3 under N<sub>2</sub> at 10 °C min<sup>-1</sup>

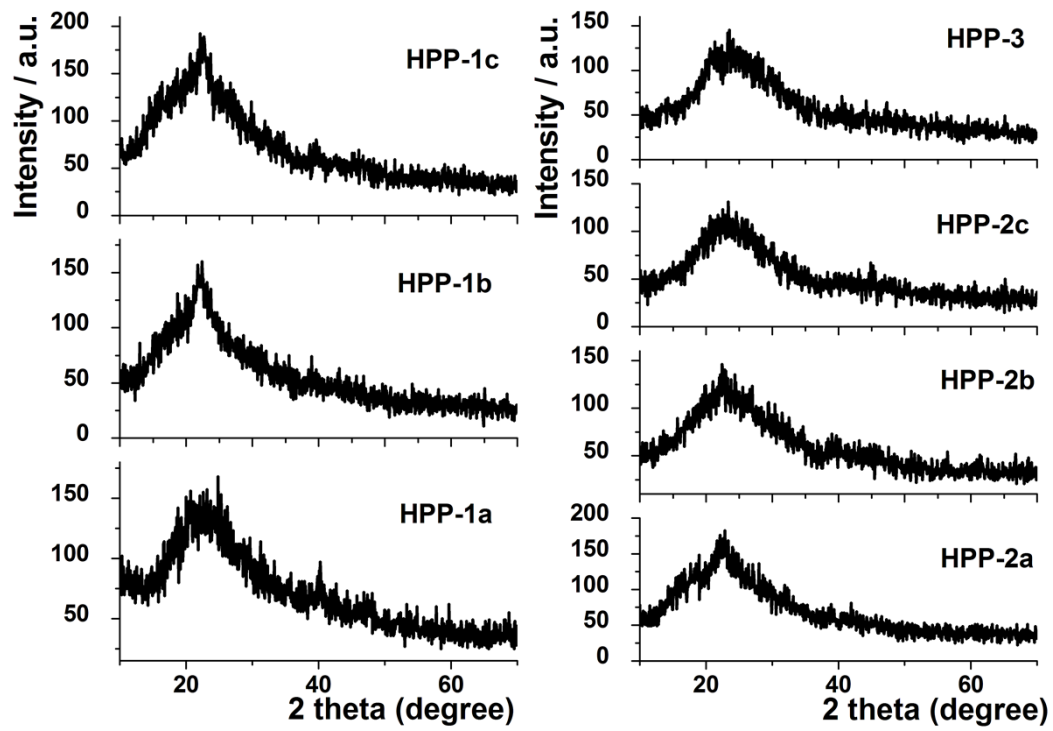

**Fig. S6.** The XRD pattern of HPP-1 to HPP-3

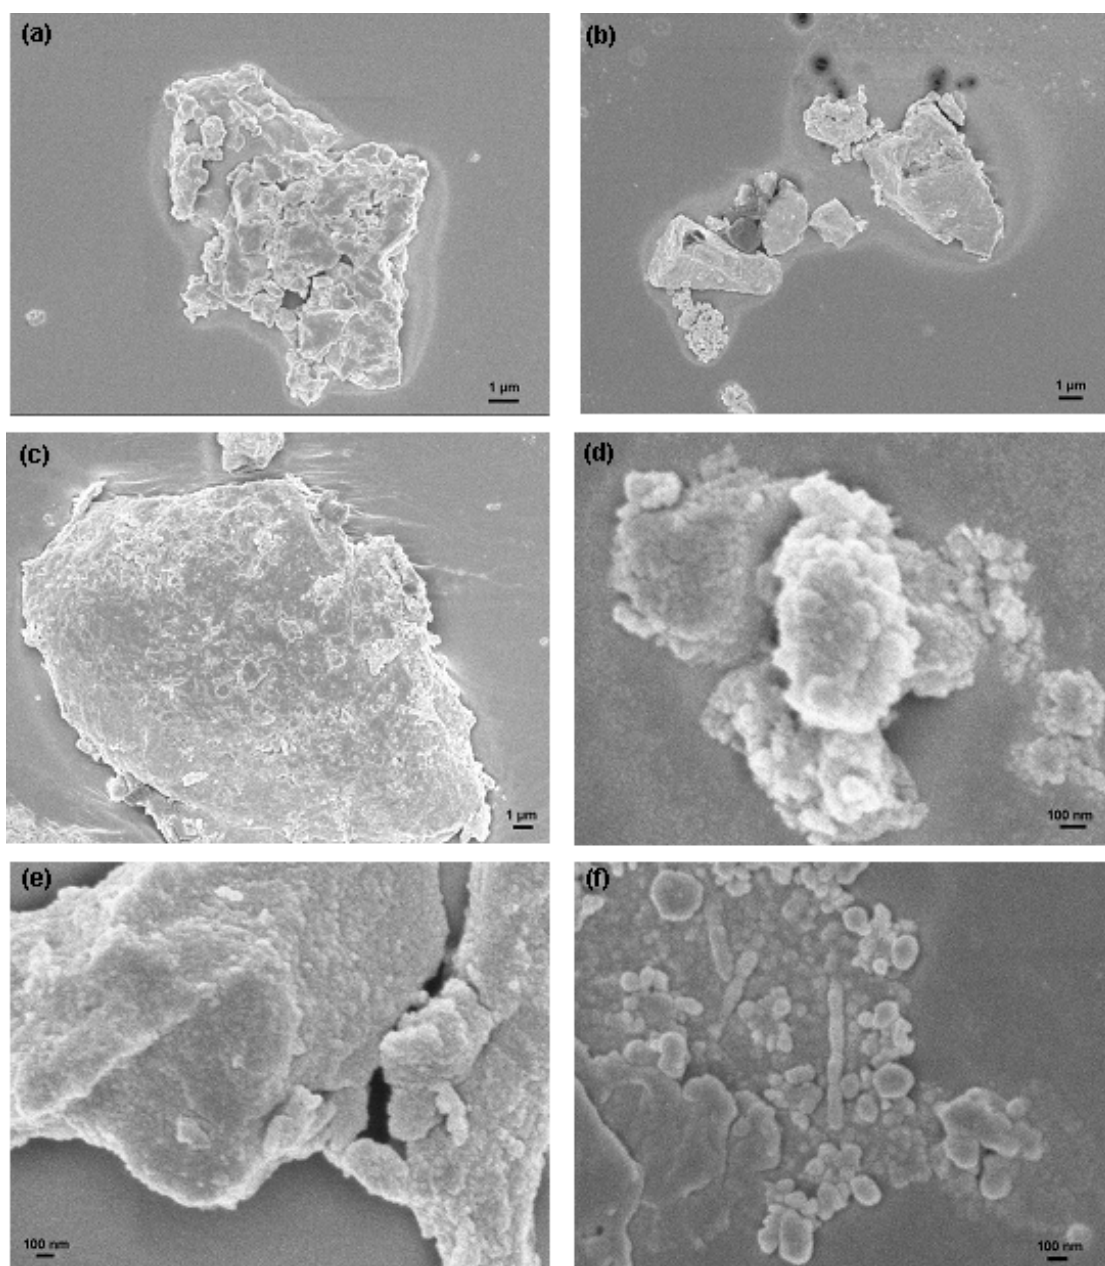

**Fig. S7.** FE-SEM images of a) HPP-1b, b) HPP-1c, c) HPP-2a, d) HPP-2b, e) HPP-2c and f) HPP-
